# Supplementary material
Source: PubMed Central journal article supplement (PMC30694)

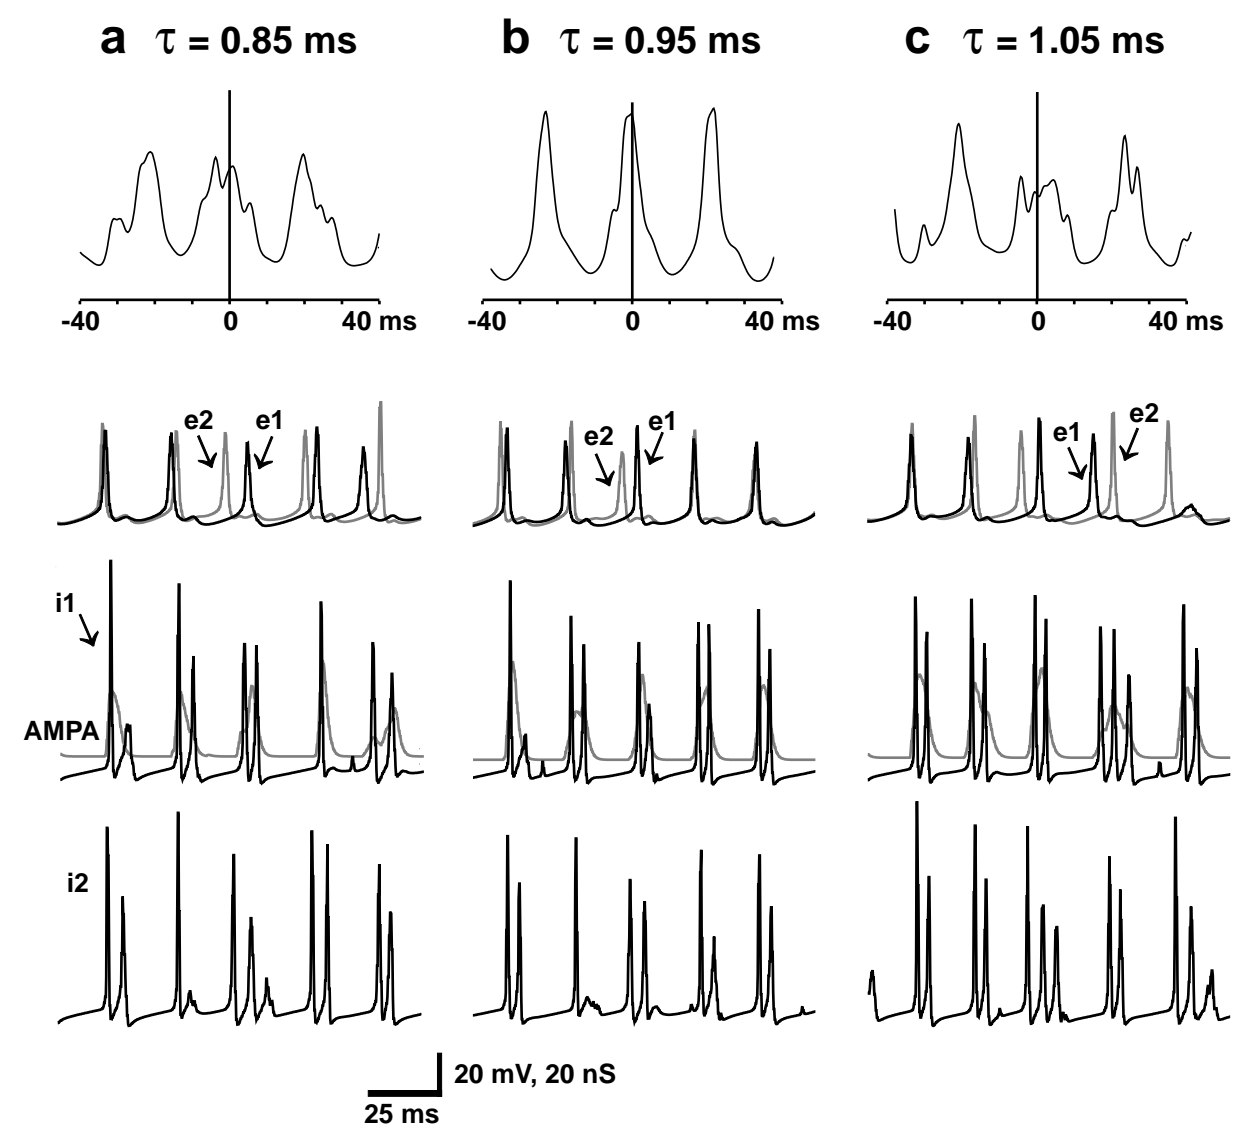

Supplement: pnas_98_6_3571__3.pdf [file pnas_98_6_3571__3.pdf]

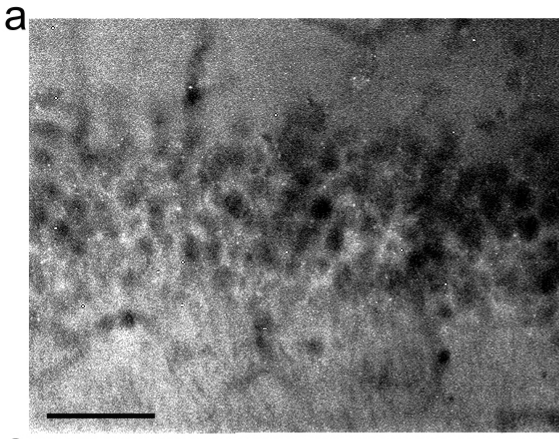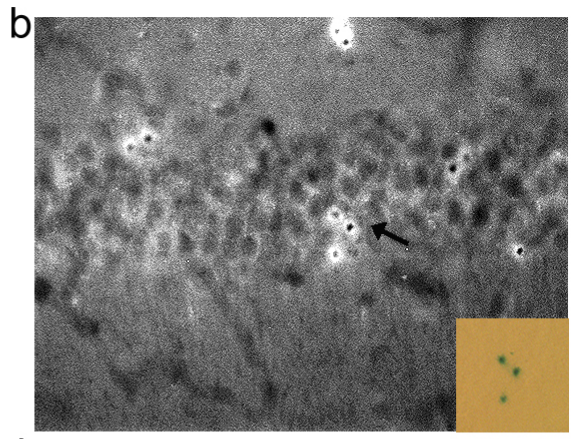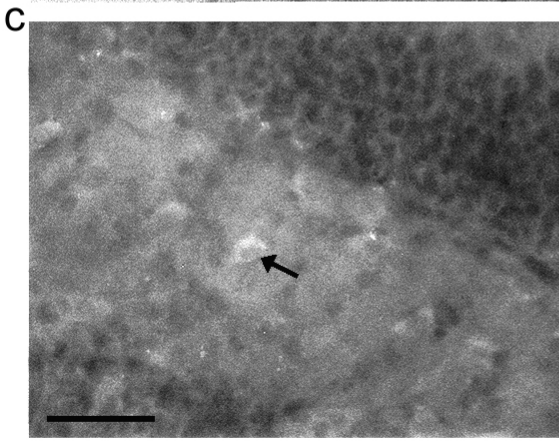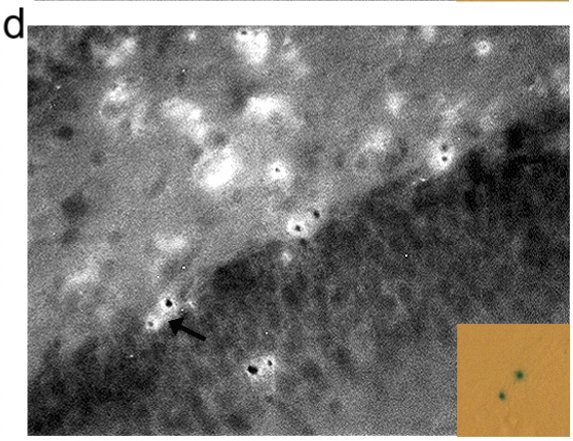

Supplement: pnas_98_6_3571__5.pdf [file pnas_98_6_3571__5.pdf]

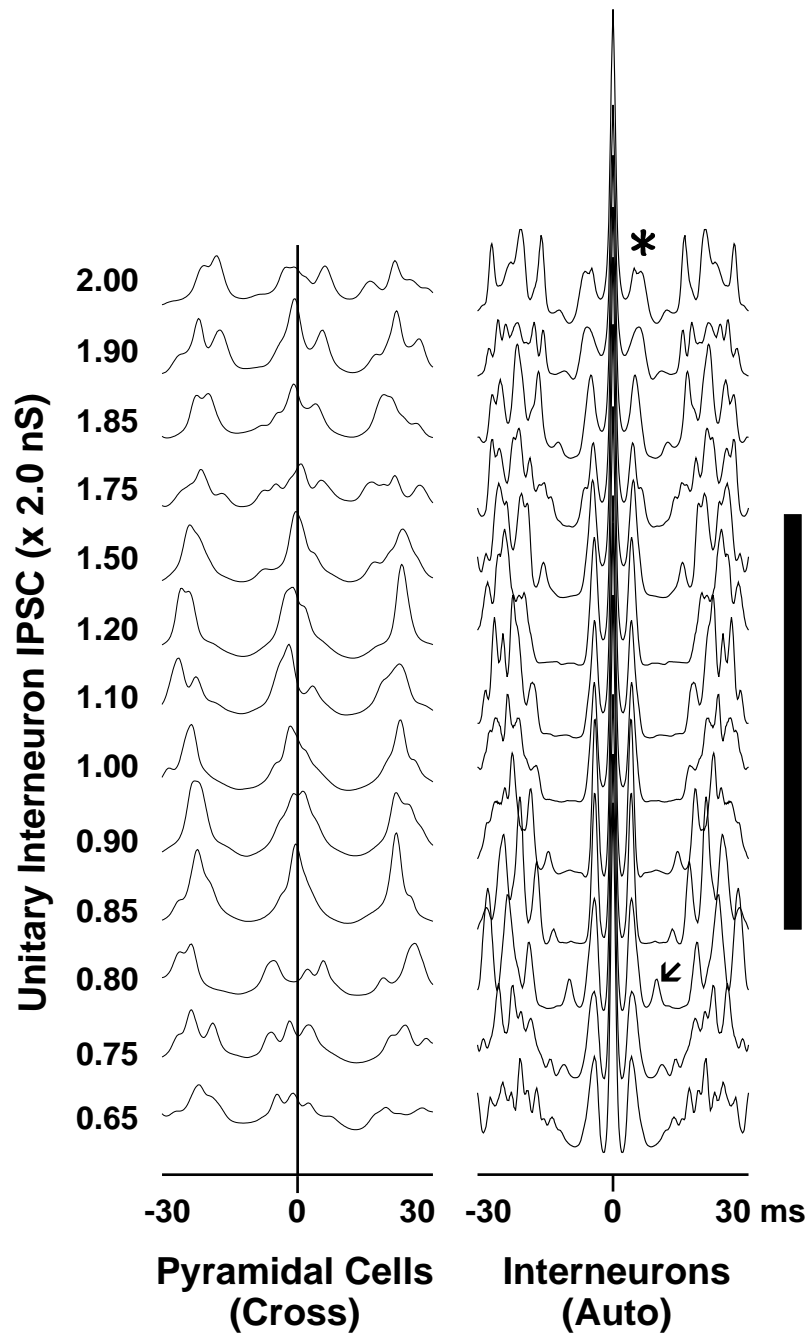

Supplement: pnas_98_6_3571__7.pdf [file pnas_98_6_3571__7.pdf]
